# Supplementary material
Source: publisher figshare collection journal article supplement (https://future-science-group.figshare.com/articles/dataset/_/21205778)
Supplement: Supplementary file 1 [file 1]

**Supplementary Table 1**

Details of cerebellum DNA samples analysed by Infinium Human Methylation 450K arrays

| Harvard Brain Bank/ Maryland Brain Bank  Number | Control/ASD | Gender | Age in Years |
| --- | --- | --- | --- |
| 616 | Control | M | 12 |
| 754 | Control | F | 12 |
| 771 | Control | M | 2 |
| 777 | Control | M | 23 |
| 814 | Control | M | 1 |
| 1025 | Control | M | 22 |
| 1027 | Control | M | 22 |
| 1038 | Control | F | 25 |
| 1052 | Control | M | 46 |
| 1063 | Control | M | 1 |
| 1101 | Control | F | 19 |
| 1185 | Control | M | 4 |
| 1259 | Control | M | 25 |
| 1266 | Control | M | 43 |
| 1285 | Control | M | 23 |
| 1324 | Control | M | 29 |
| 1407 | Control | F | 9 |
| 1409 | Control | M | 18 |
| 1429 | Control | M | 19 |
| 1442 | Control | M | 23 |
| 1453 | Control | M | 1 |
| 1465 | Control | M | 17 |
| 1486 | Control | F | 23 |
| 1488 | Control | M | 1 |
| 1500 | Control | M | 6 |
| 1547 | Control | M | 1 |
| 1670 | Control | M | 13 |
| 1674 | Control | M | 8 |
| 1712 | Control | M | 20 |
| 1713 | Control | M | 23 |
| 1860 | Control | M | 8 |
| 1906 | Control | M | 2 |
| 1981 | Control | M | 25 |
| 2149 | Control | M | 16 |
| 2456 | Control | F | 0 |
| 2830 | Control | M | 55 |
| 2880 | Control | M | 36 |
| 3428 | Control | F | 56 |
| 3439 | Control | F | 42 |
| 4332 | Control | M | 5 |
| 4337 | Control | M | 8 |
| 4670 | Control | M | 4 |
| 5180 | Control | M | 1 |
| 5282 | Control | M | 2 |
| 10251 | Control | M | 10 |
| 1182 | Autism | F | 10 |
| 3345 | Autism | M | 2 |
| 4231 | Autism | M | 8 |
| 4498 | Autism | M | 56 |
| 4849 | Autism | M | 7 |
| 4925 | Autism | M | 9 |
| 5000 | Autism | M | 27 |
| 5144 | Autism | M | 20 |
| 5173 | Autism | M | 30 |
| 5308 | Autism | M | 21 |
| 5334 | Autism | M | 30 |
| 5342 | Autism | F | 11 |
| 5569 | Autism | M | 5 |
| 5666 | Autism | M | 8 |
| 6184 | Autism | F | 18 |
| 6294 | Autism | M | 16 |
| 6337 | Autism | M | 22 |
| 6365 | Autism | M | 10 |
| 6399 | Autism | M | 2 |
| 6401 | Autism | M | 39 |
| 6469 | Autism | F | 49 |
| 6640 | Autism | F | 29 |
| 6677 | Autism | M | 30 |
| 6856 | Autism | F | 26 |
| 7014 | Autism | M | 11 |
| 8873 | Autism | M | 5 |
| 13872 | Autism | F | 5 |
| 14762 | Autism | M | 9 |
| 16641 | Autism | M | 9 |
| 19511 | Autism | M | 8 |
